# Supplementary material for: Apoptotic effect of novel Schiff Based CdCl2(C14H21N3O2) complex is mediated via activation of the mitochondrial pathway in colon cancer cells
Source: PubMed Central journal article supplement (PMC4649862; doi:10.1038/srep09097), 2015-03-13
Supplement: srep09097-s1.pdf [file srep09097-s1.pdf]

**Apoptotic effect of novel Schiff Based CdCl<sub>2</sub>(C<sub>14</sub>H<sub>21</sub>N<sub>3</sub>O<sub>2</sub>) complex is mediated via activation of the mitochondrial pathway in colon cancer cells**

Maryam Hajrezaie<sup>1,2</sup>, Mohammadjavad Paydar<sup>3</sup>, Chung Yeng Looi<sup>3</sup>, Soheil Zorofchian Moghadamtousi<sup>2</sup>, Pouya Hassandarvish<sup>1</sup>, Muhammad Saleh Salga<sup>4</sup>, Hamed Karimian<sup>3</sup>, Keivan Shams<sup>2</sup>, Maryam Zahedifard<sup>1,2</sup>, Nazia Abdul Majid<sup>2</sup>, Hapipah Mohd Ali<sup>4</sup>, Mahmood Ameen Abdulla<sup>1\*</sup>

**Supplementary table-1 corresponding assays, cell number of each assay, complex concentrations and the corresponding tables and figures.**

| <b>Corresponding assays</b>                             | <b>Cell number</b>            | <b>Corresponding complex concentration</b> | <b>Corresponding table/figure</b> |
|---------------------------------------------------------|-------------------------------|--------------------------------------------|-----------------------------------|
| Cell culture and cell viability assay                   | (1× 10 <sup>5</sup> cells/mL) | 0 -50 µg/mL                                | Table 1                           |
| LDH release assay                                       | (1× 10 <sup>5</sup> cells/mL) | 0, 0.75, 1.5 and 3 g/ml                    | Figure 1                          |
| Cell cycle analysis                                     | (1× 10 <sup>6</sup> cells/mL) | 3 µg/mL                                    | Figure 2, 3                       |
| Acridine orange/<br>propidium iodide<br>double staining | (1× 10 <sup>5</sup> cells/mL) | 3 µg/mL                                    | Figure 4                          |
| (ROS) generation                                        | (1× 10 <sup>5</sup> cells/mL) | 0, 0.75, 1.5 and 3 µg/ml                   | Figure 5                          |
| Multiple cytotoxicity assay                             | (1× 10 <sup>5</sup> cells/mL) | 3 µg/mL                                    | Figure 6                          |
| Measurement of caspase activities                       | (1× 10 <sup>5</sup> cells/mL) | 0, 0.75, 1.5 and 3 µg/ml                   | Figure 7                          |
| Measurement of NF-κB activity                           | (1× 10 <sup>5</sup> cells/mL) | 3 µg/mL                                    | Figure 8                          |
| Western Blot experiments                                | (1× 10 <sup>6</sup> cells/mL) | 0, 1.5 and 3 µg/ml                         | Figure 9                          |
| Apoptosis Evaluation                                    | (1× 10 <sup>5</sup> cells/mL) | 3 µg/mL                                    | Figure 10                         |
| Quantitative PCR analysis                               | (1× 10 <sup>6</sup> cells/mL) | 0, 1.5 and 3 µg/ml                         | Figure 11                         |
